# Supplementary figures and images for: Hybrid Stromal Vascular Fraction (Hybrid-SVF): A New Paradigm in Mechanical Regenerative Cell Processing
Source: PubMed Central journal article supplement — Plast Reconstr Surg Glob Open. 2022 Dec 30;10(12):e4702. doi: 10.1097/GOX.0000000000004702 (PMC9803457; doi:10.1097/gox.0000000000004702), 2022-12-30

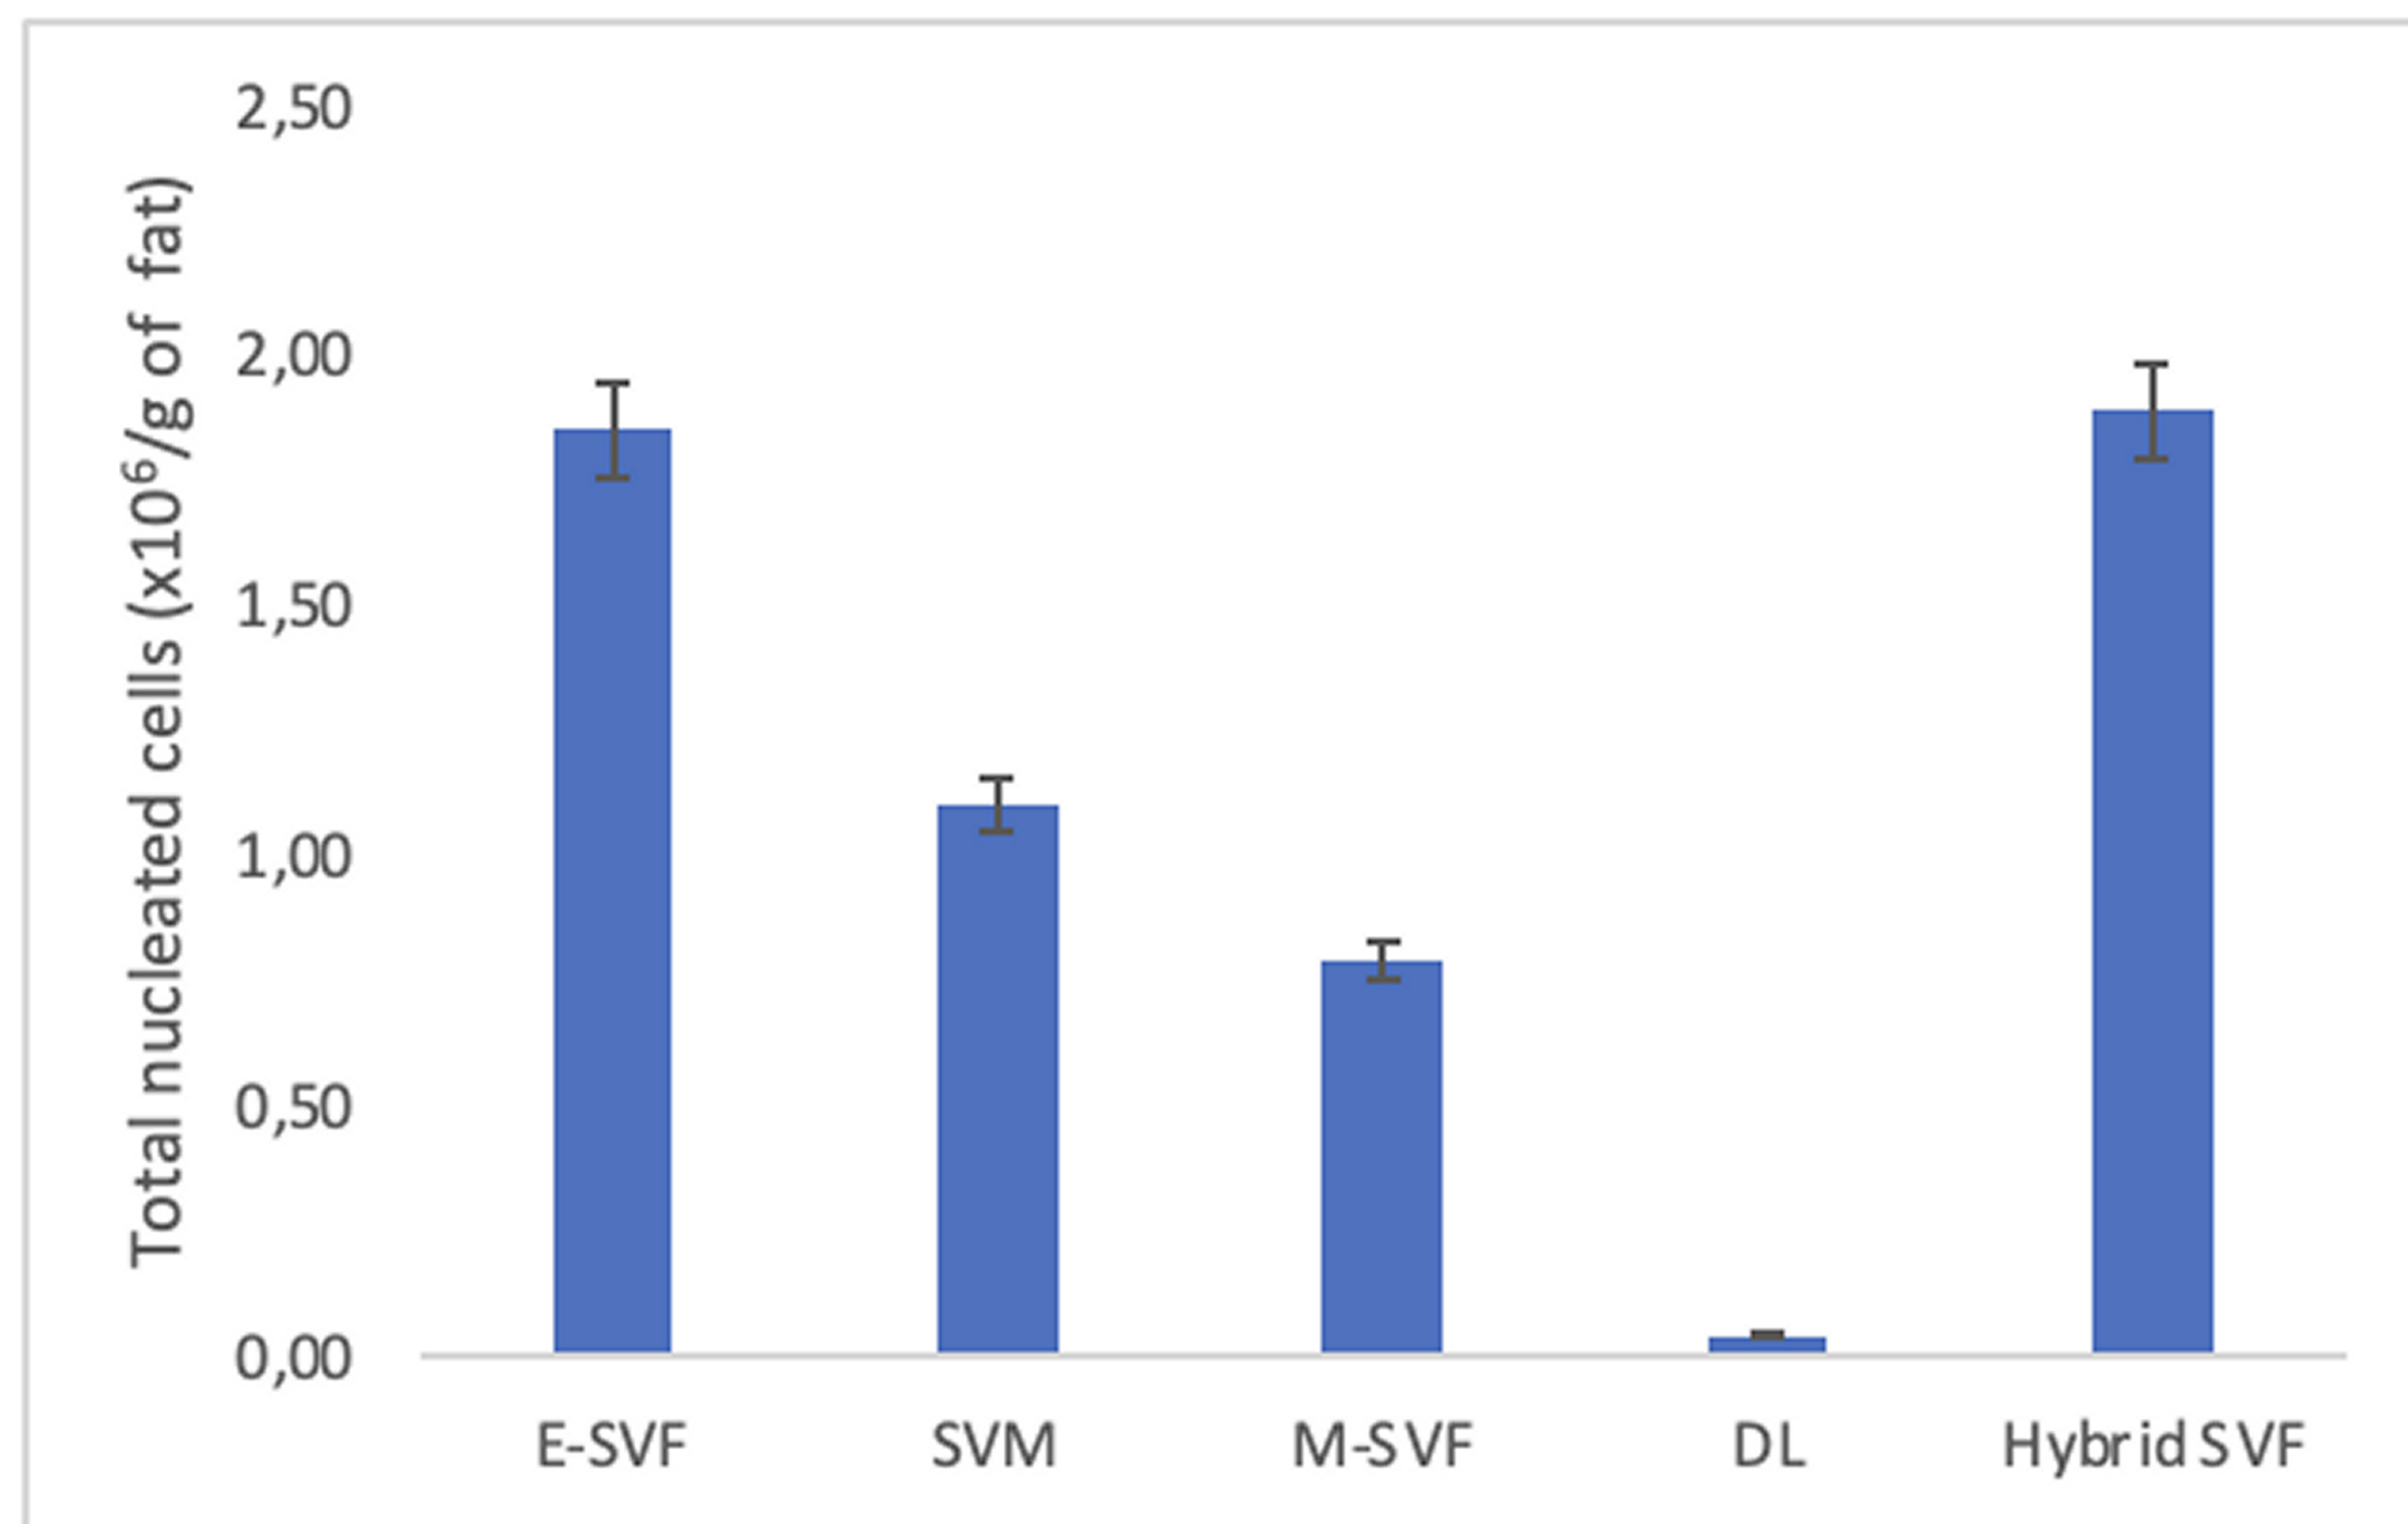

(a)

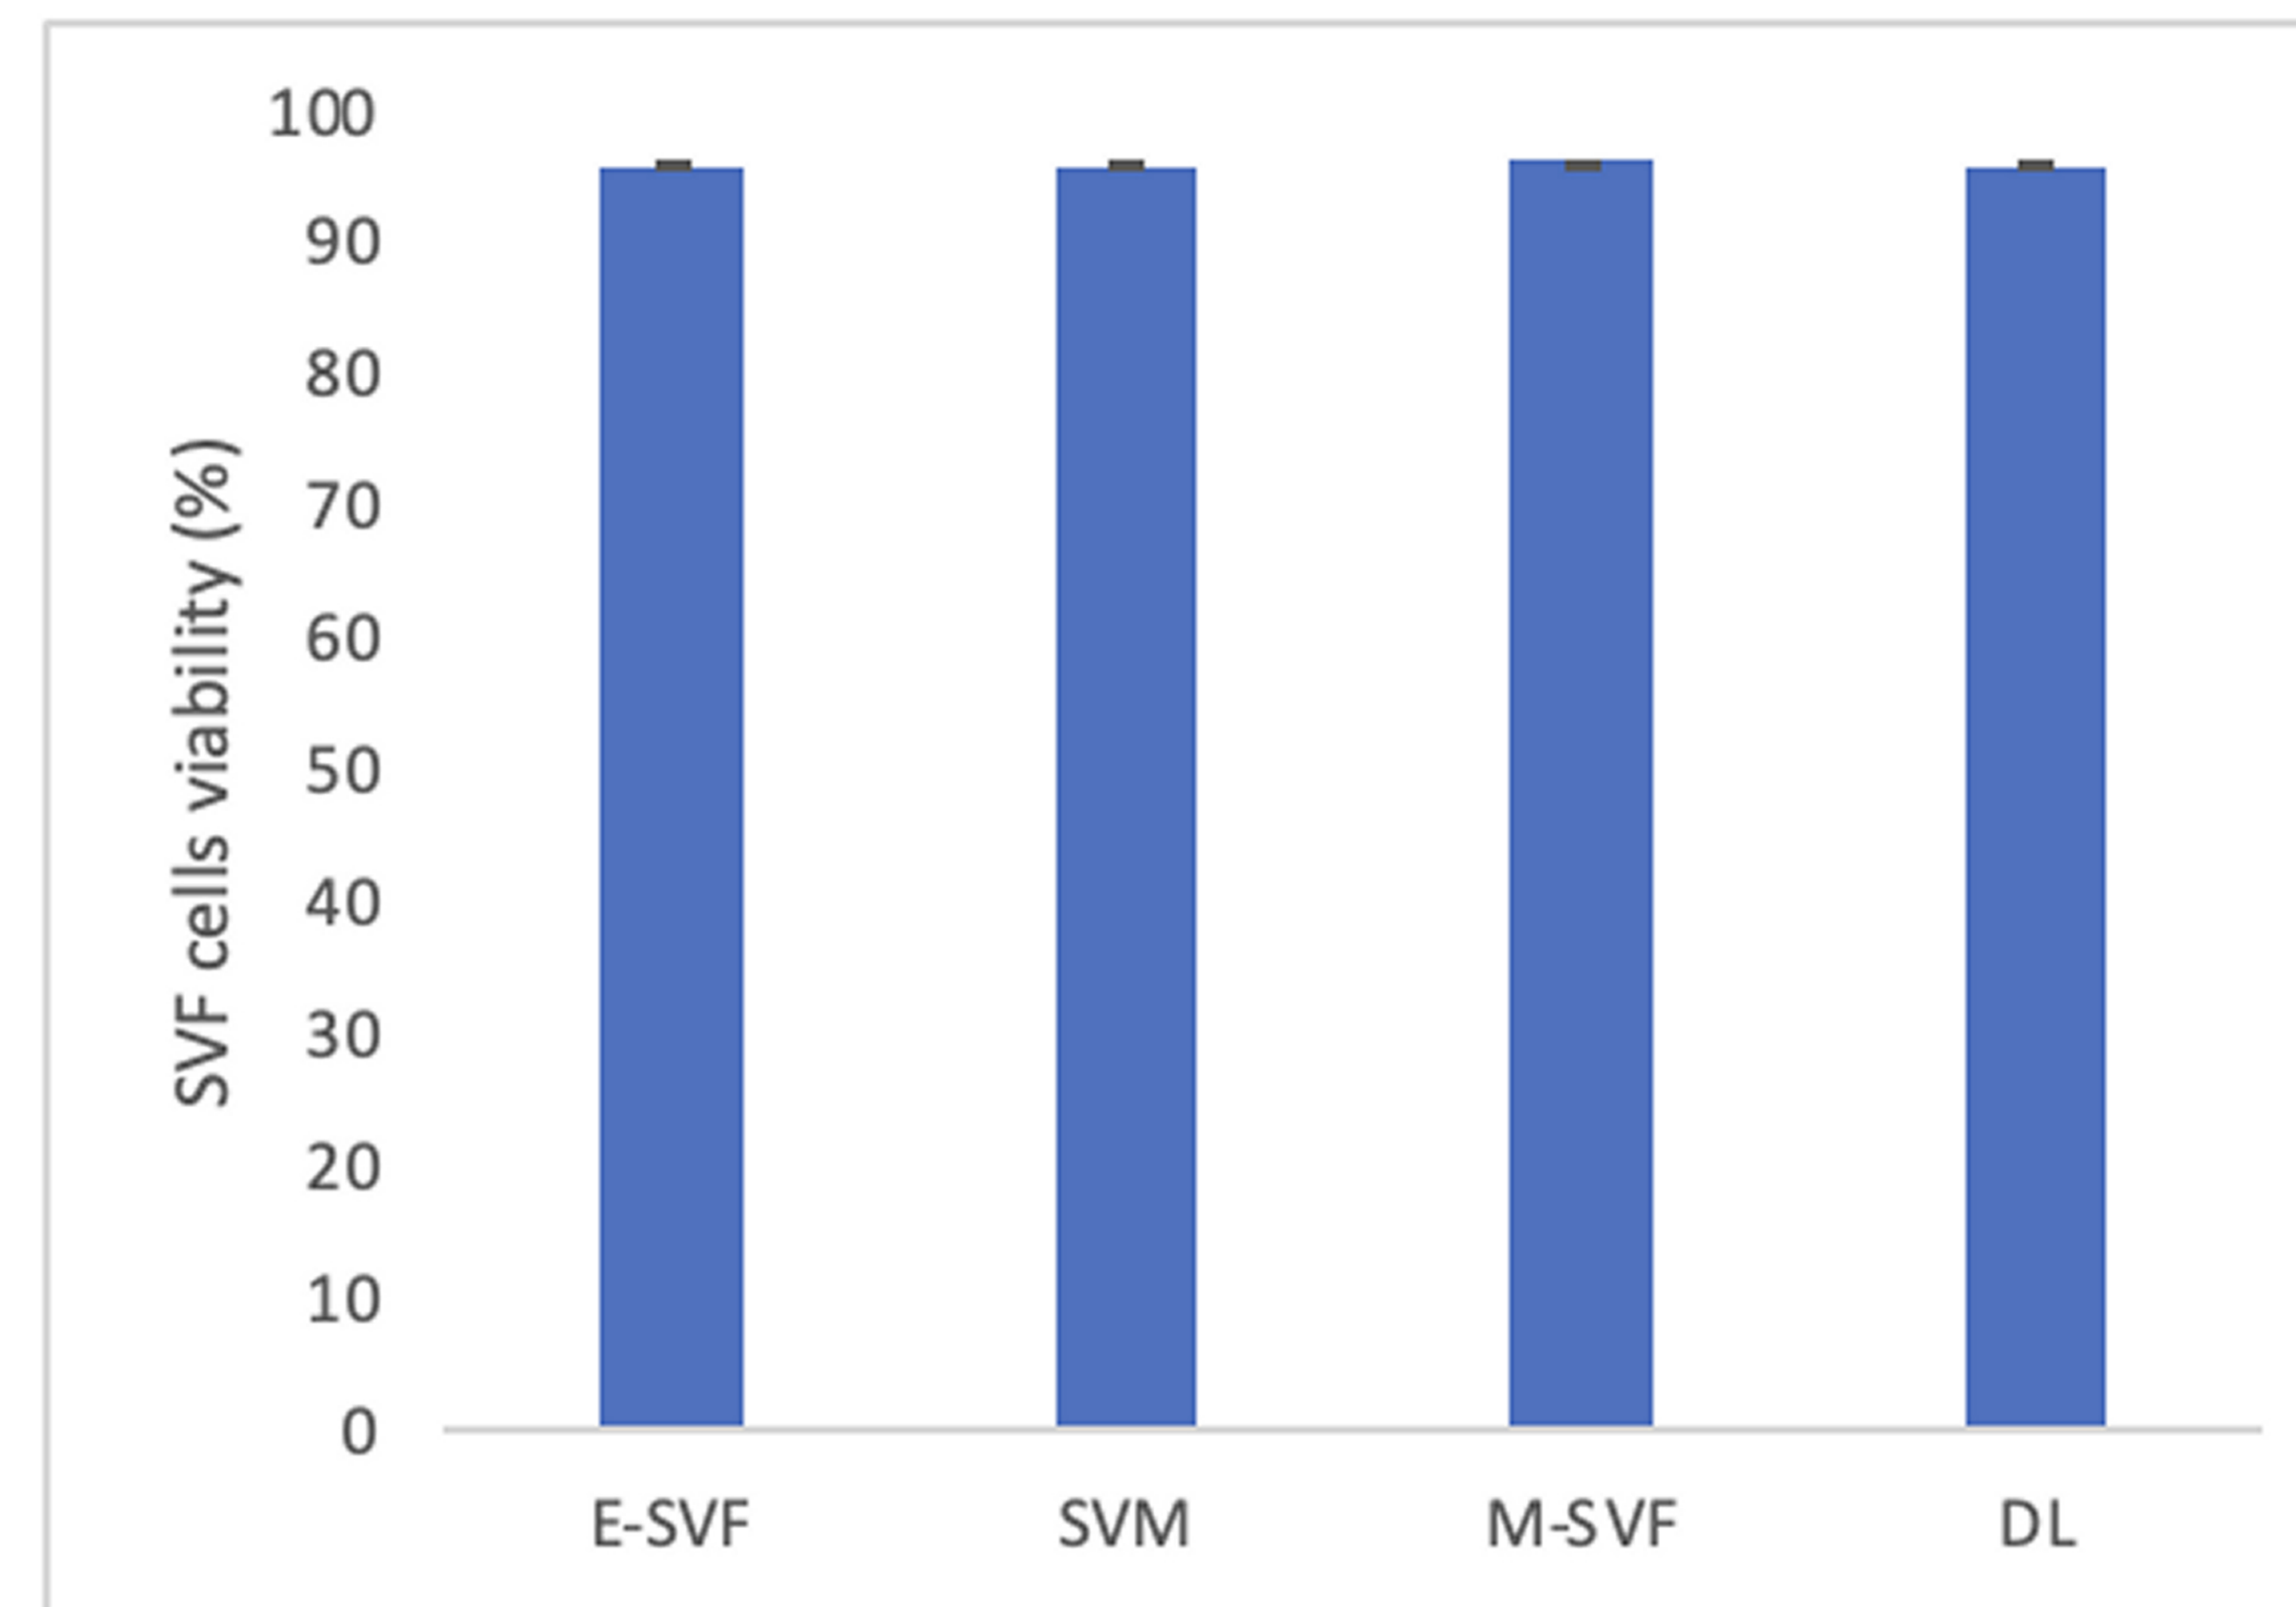

(b)

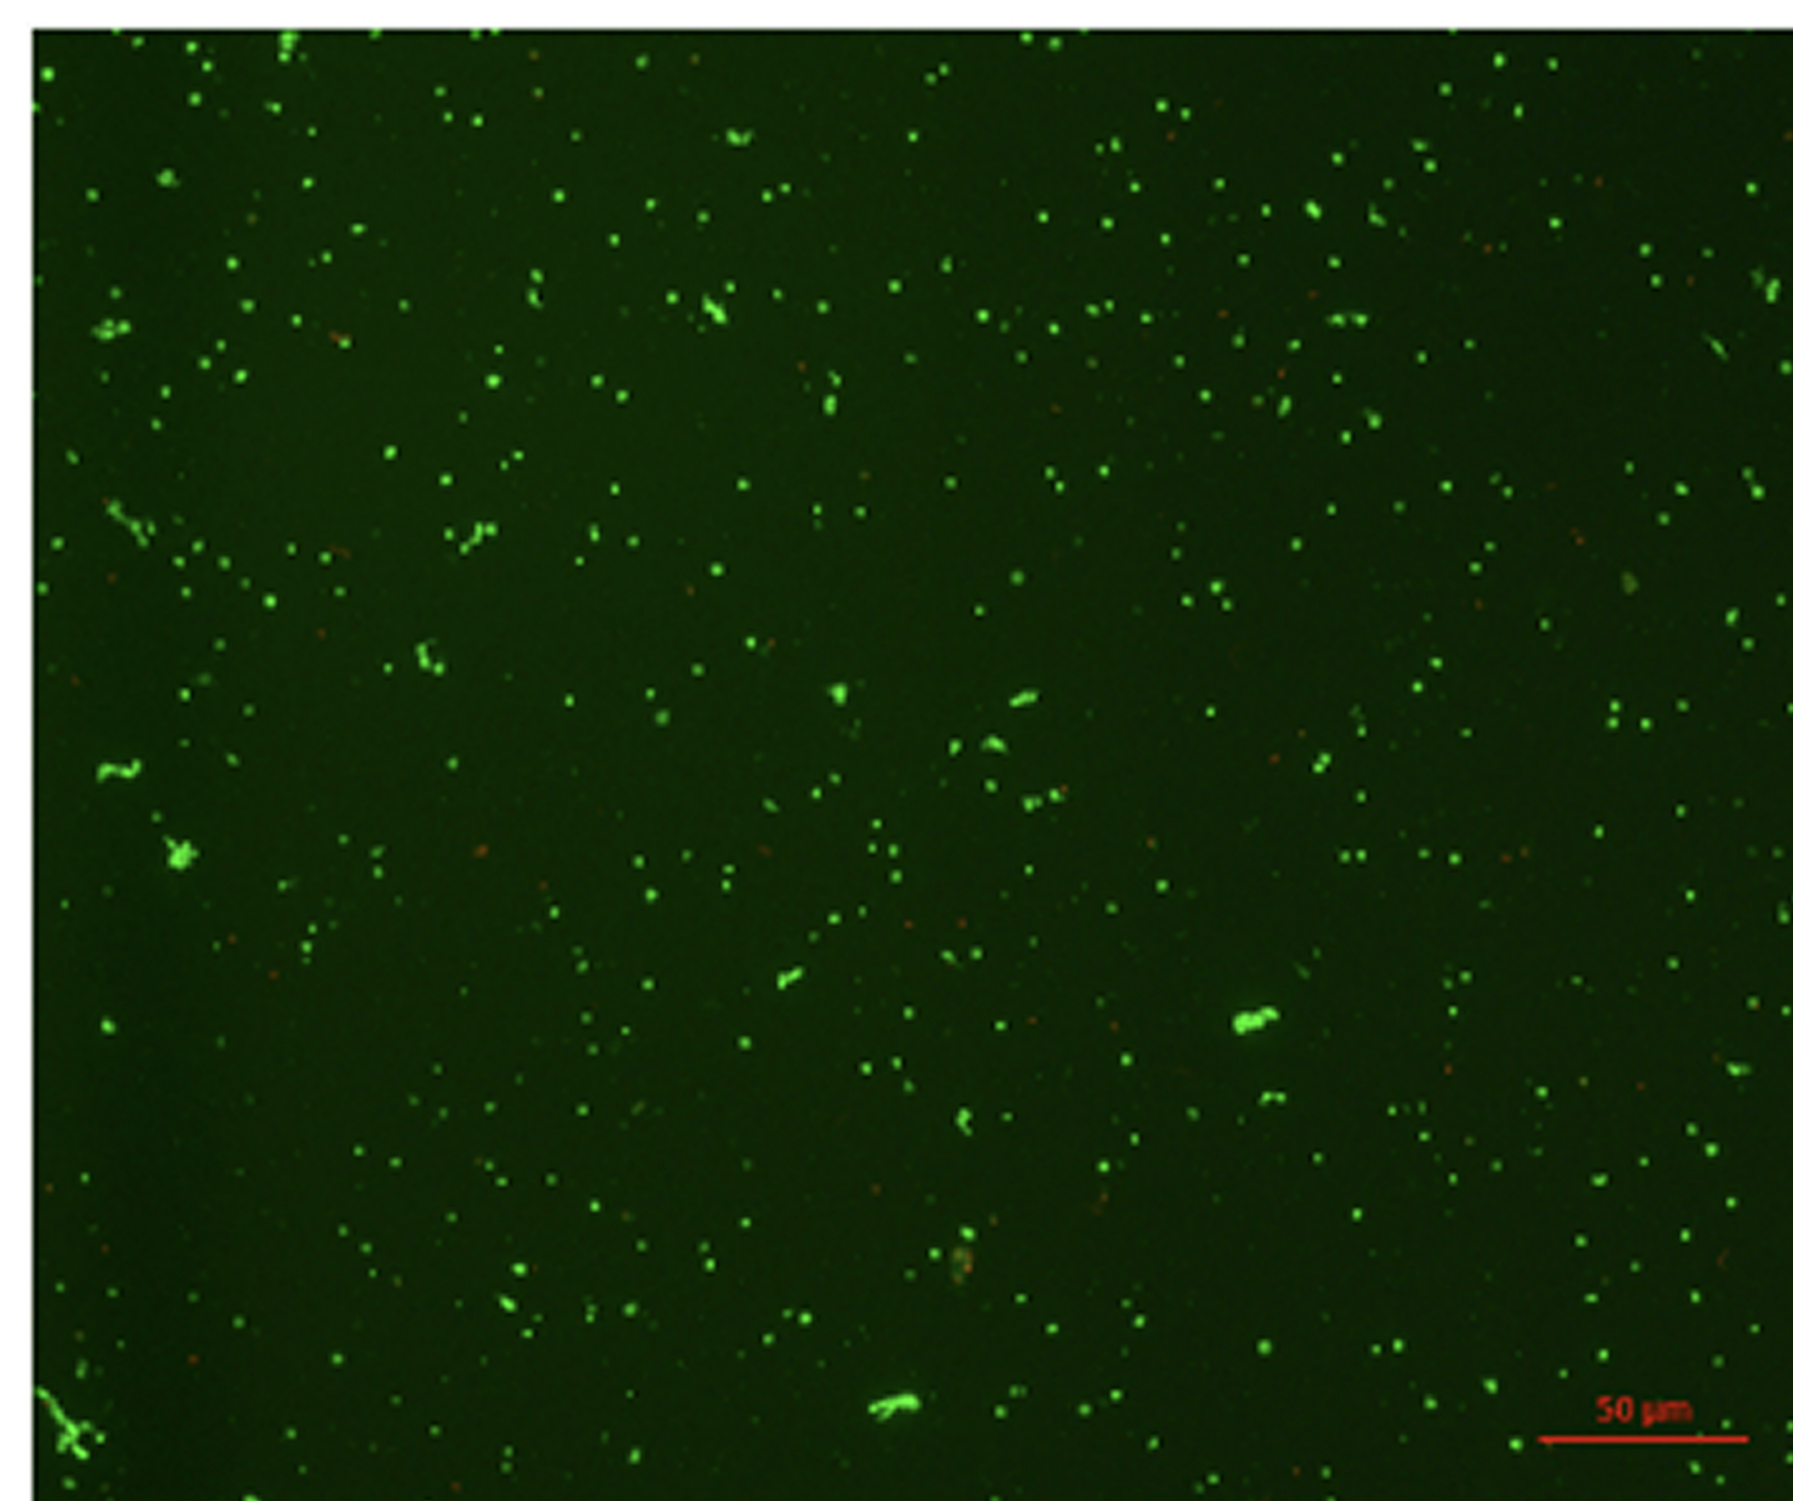

(c)

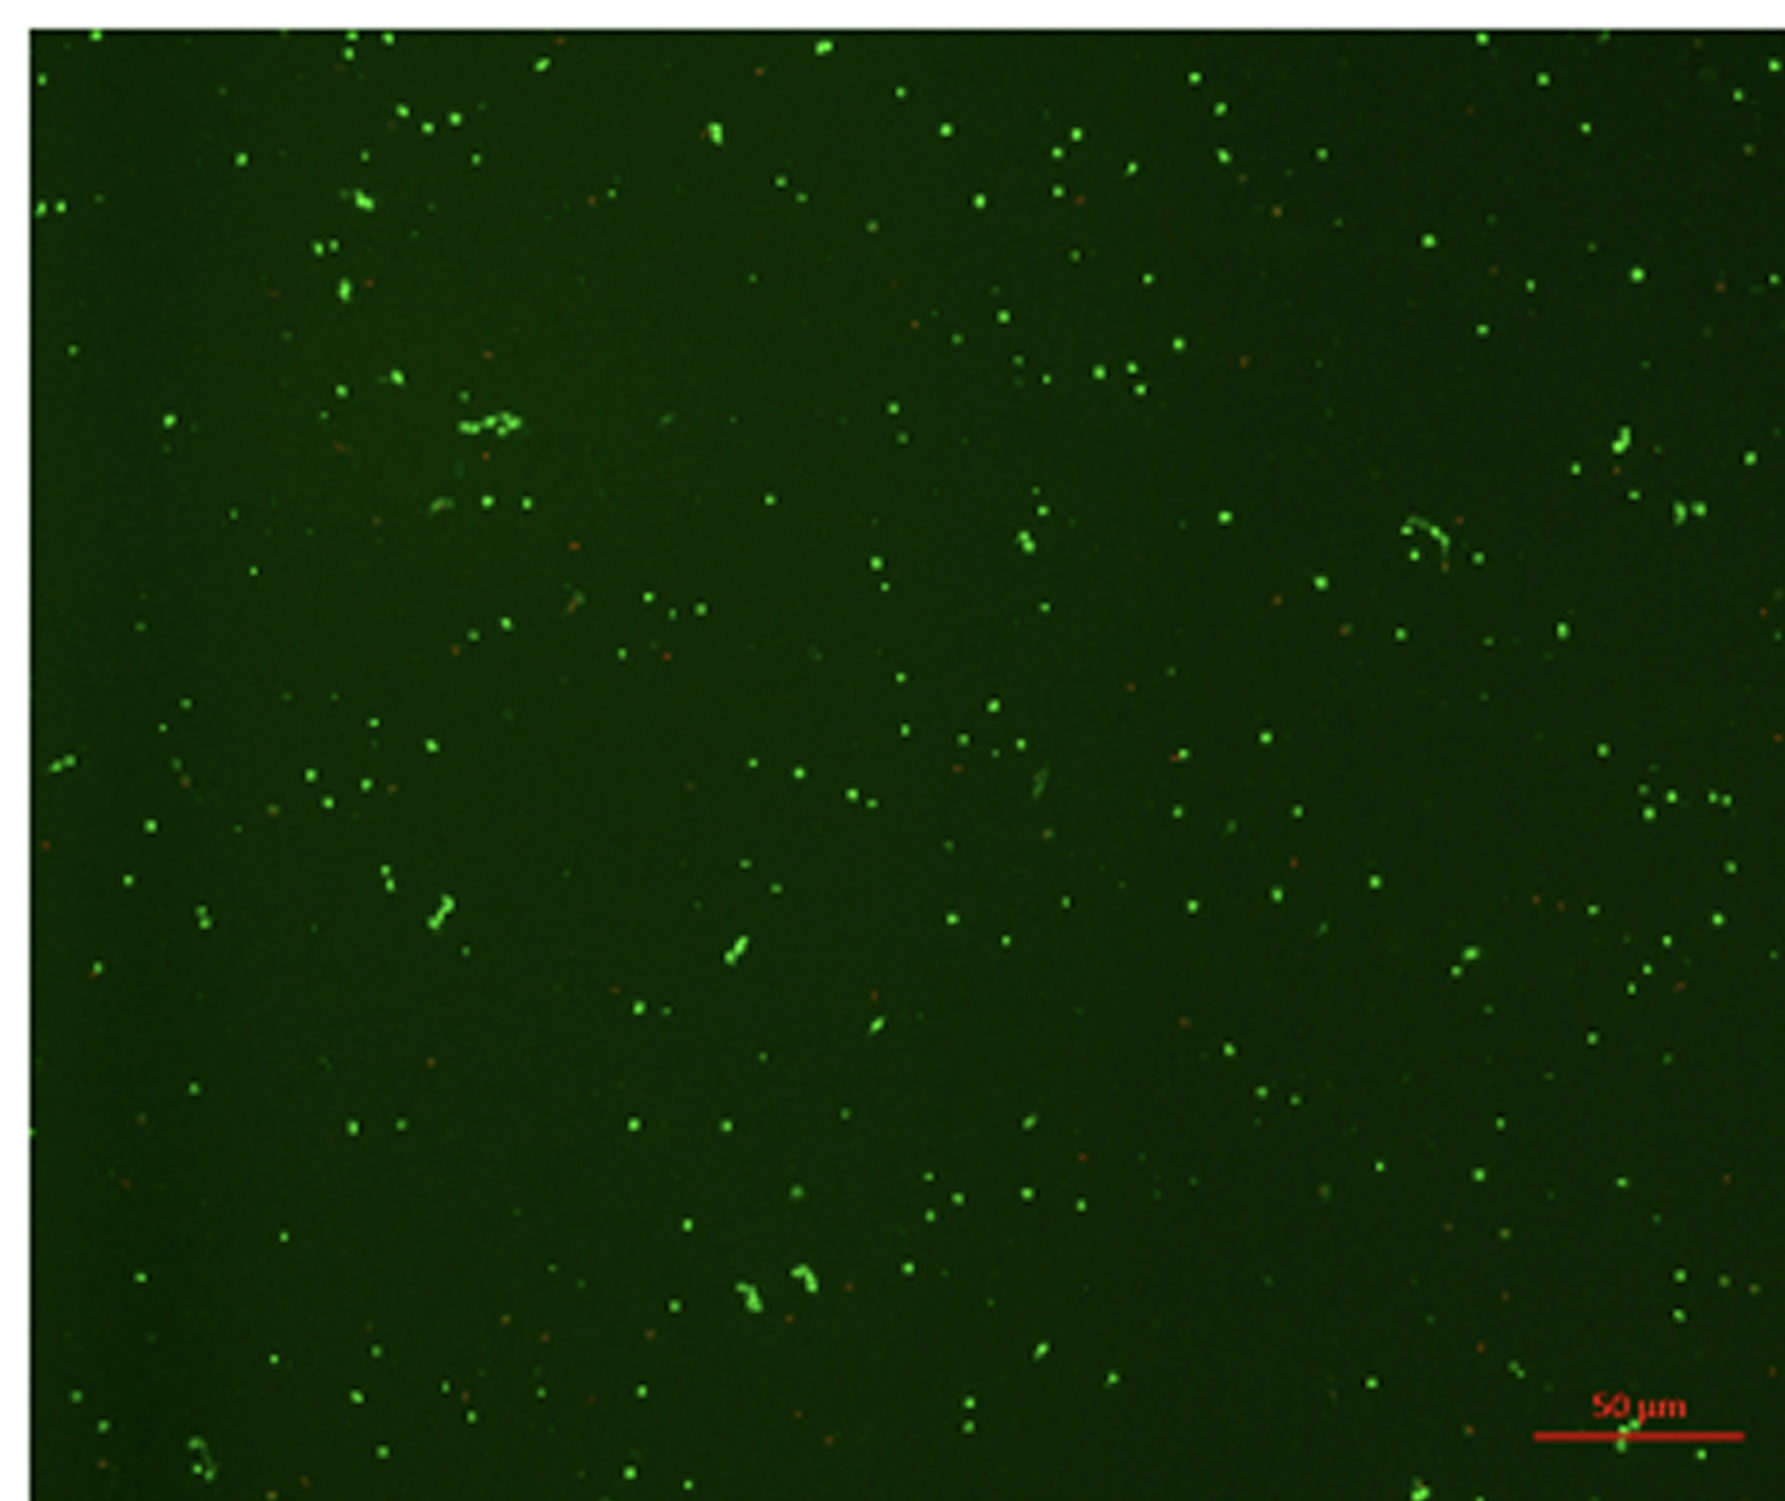

(d)

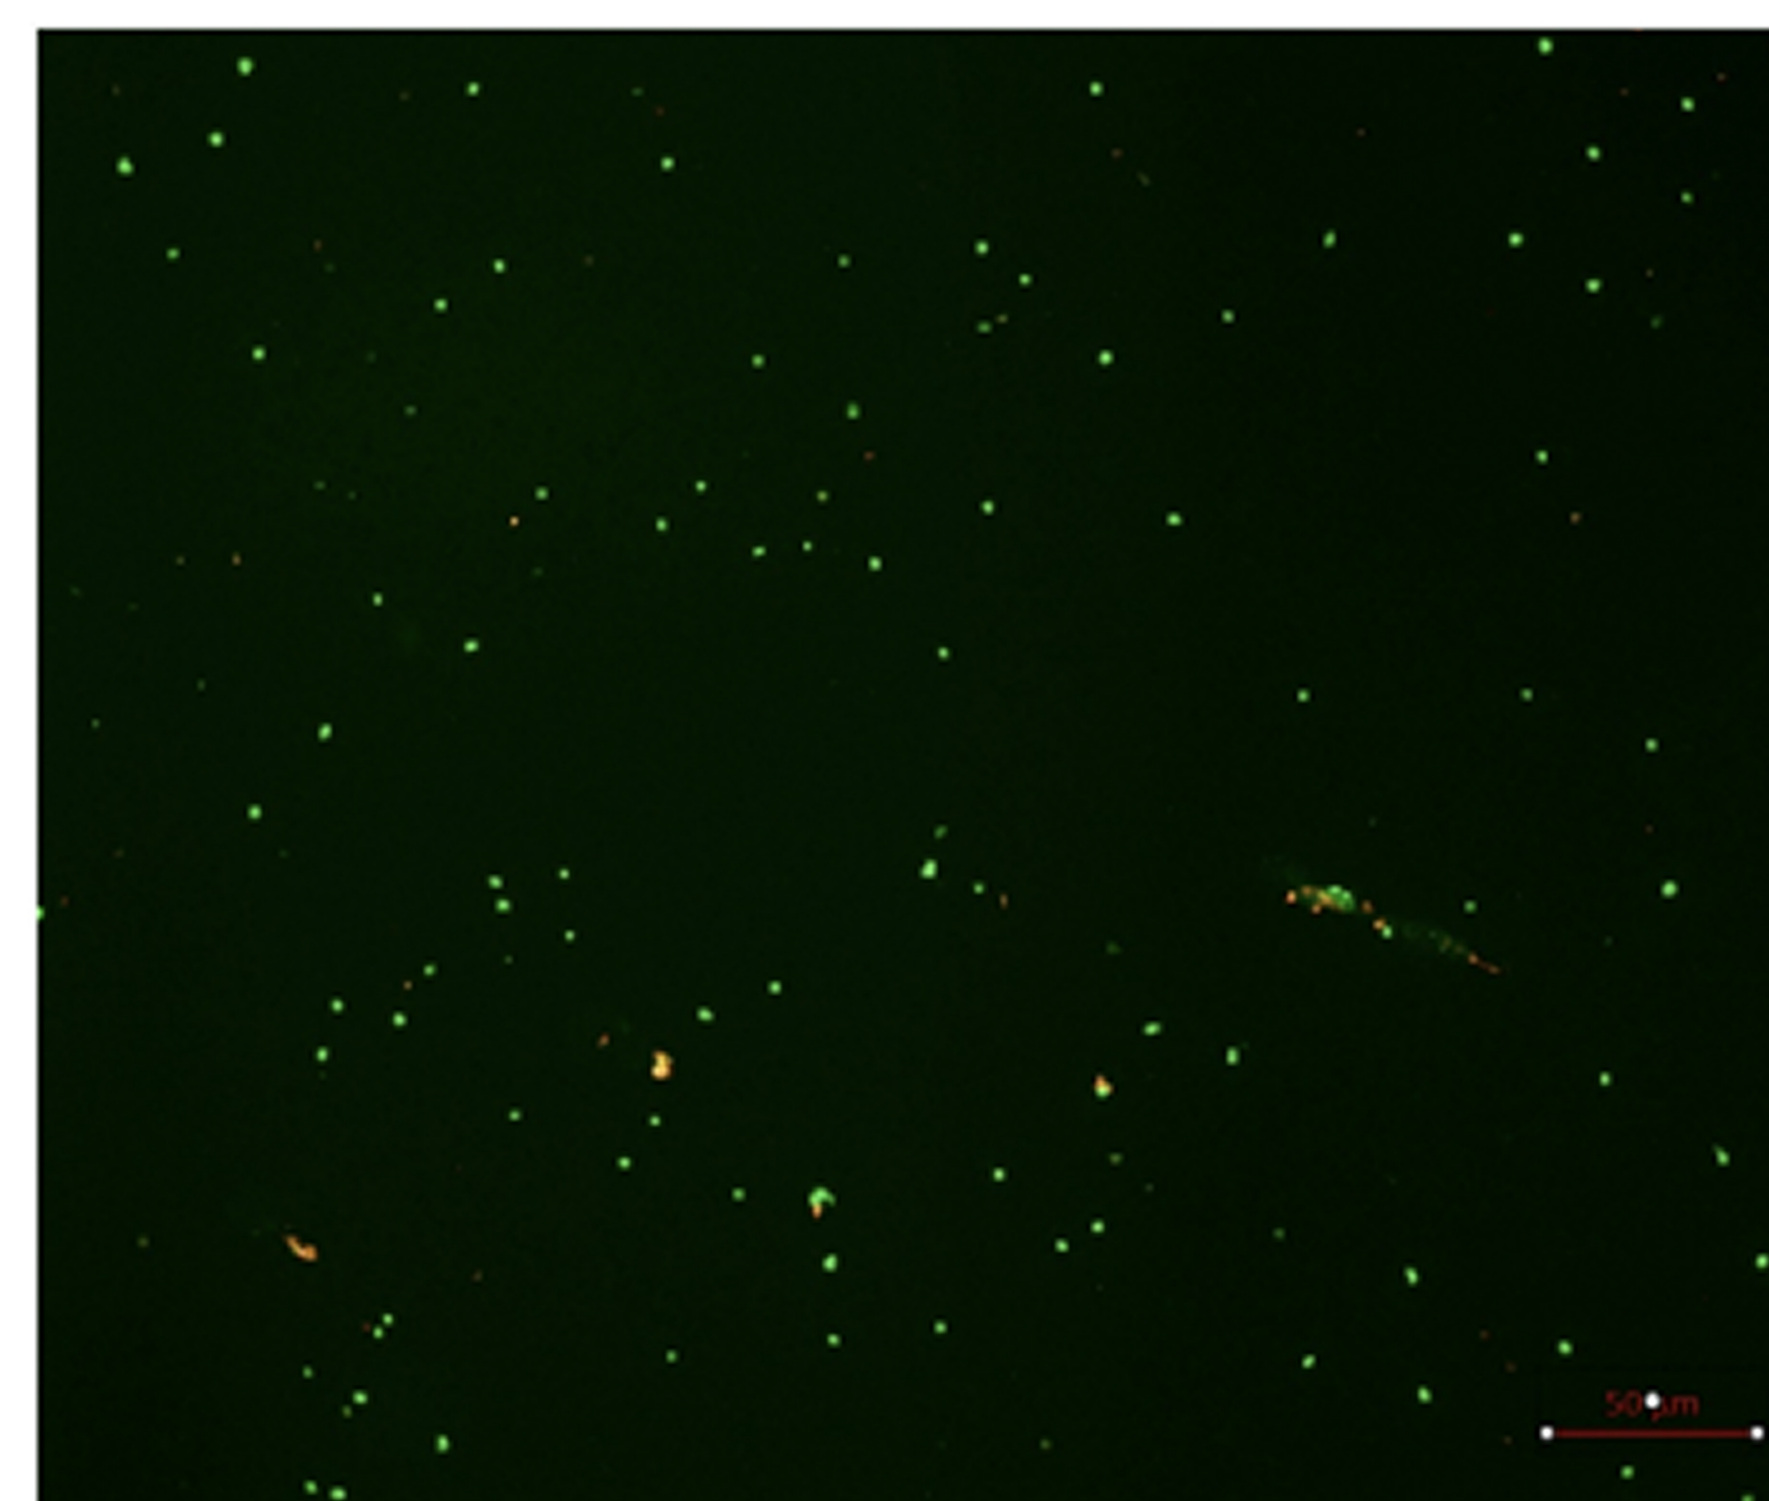

(e)

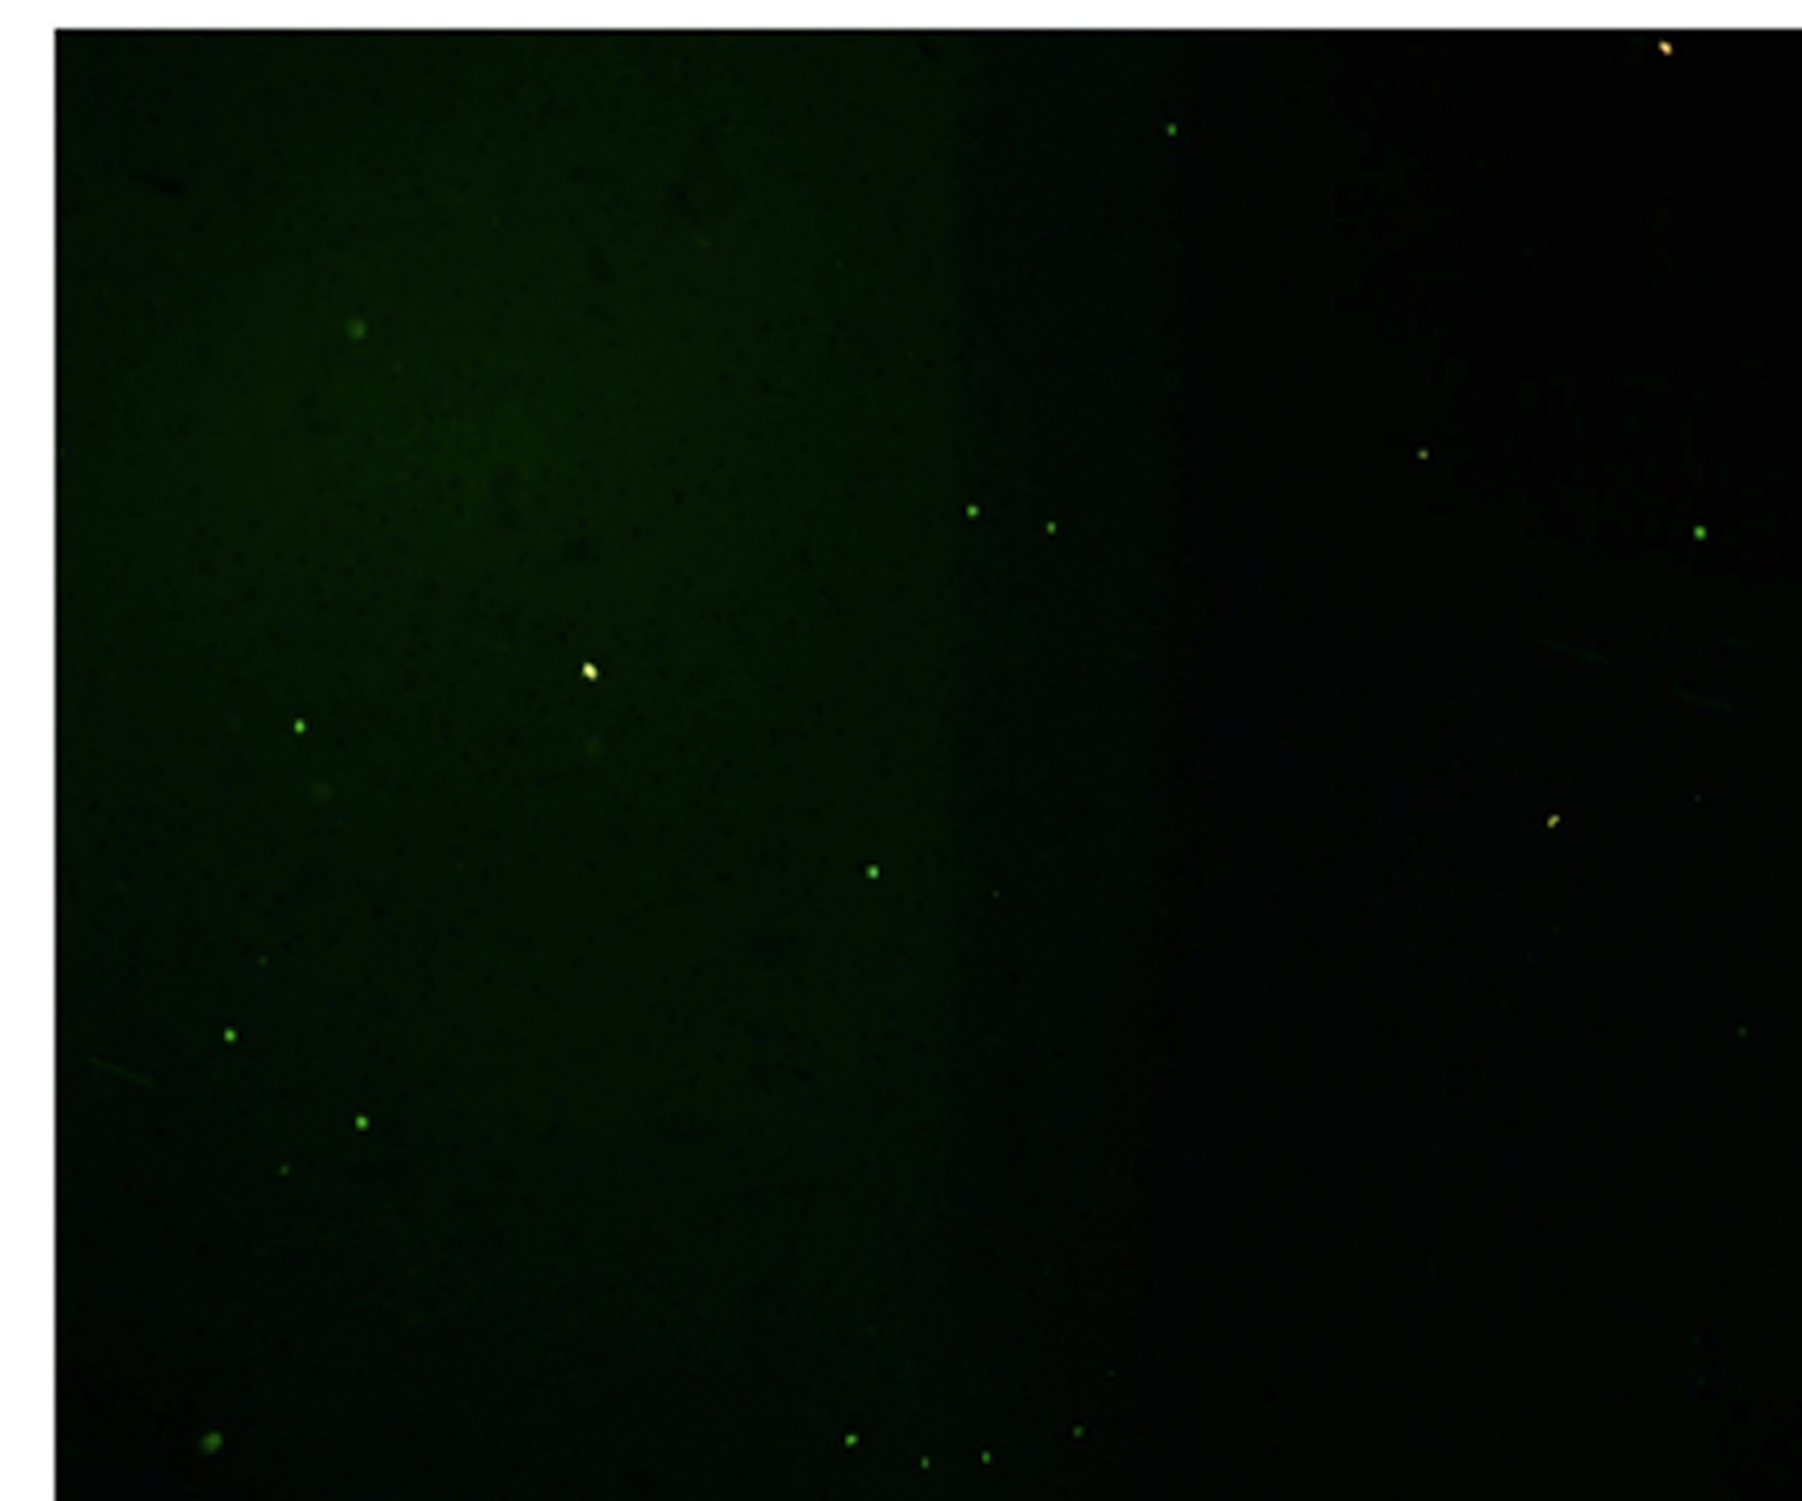

(f)

Supplement: gox-10-e4702-s001.pdf [file gox-10-e4702-s001.pdf]
